# Supplementary material
Source: Springer Nature journal article supplement (https://www.springermedizin.de/resource/supplementary/12889_2010_3516_MOESM3_ESM.pdf/9489156)
Supplement: MOESM3 [file 9489156]

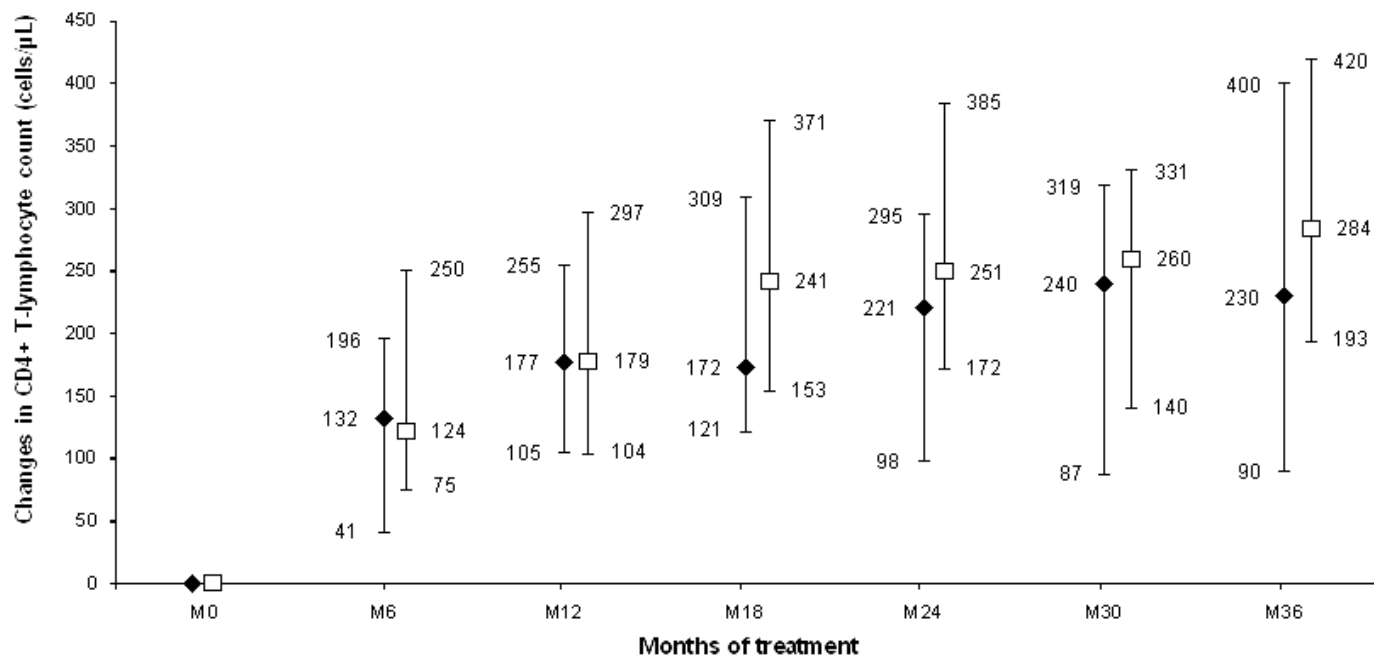

| Months of treatment                                            | M6   | M12  | M18  | M24  | M30  | M36  |
|----------------------------------------------------------------|------|------|------|------|------|------|
| <b>FSWs (◆)</b>                                                |      |      |      |      |      |      |
| Expected visits, No.                                           | 44   | 44   | 38   | 31   | 26   | 23   |
| CD4 measurement available, No.                                 | 43   | 41   | 35   | 29   | 26   | 22   |
| <b>Non-FSWs (□)</b>                                            |      |      |      |      |      |      |
| Expected visits, No.                                           | 48   | 47   | 42   | 32   | 30   | 25   |
| CD4 measurement available, No.                                 | 48   | 46   | 39   | 30   | 28   | 24   |
| <i>P</i> value for difference between values at each timepoint | 0.18 | 0.40 | 0.11 | 0.17 | 0.57 | 0.30 |
